# Supplementary material for: Cell-surface markers for colon adenoma and adenocarcinoma
Source: PubMed Central journal article supplement (PMC4951249; doi:10.18632/oncotarget.7402), 2016-02-15
Supplement: oncotarget-07-17773-s001.pdf [file oncotarget-07-17773-s001.pdf]

## Cell-surface markers for colon adenoma and adenocarcinoma

### SUPPLEMENTARY FIGURES AND TABLES

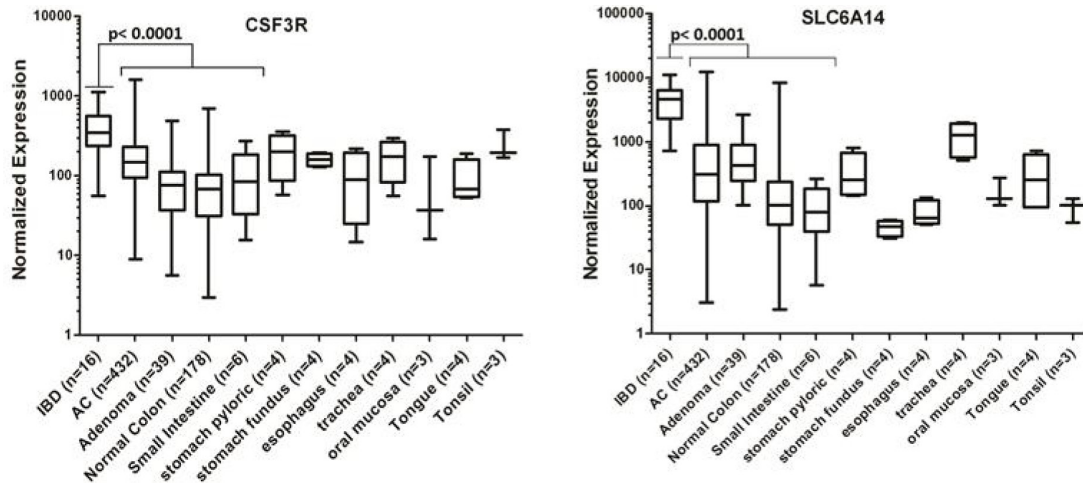

**Figure S1: Microarray mRNA expression profiles of IBD cell-surface markers.** Values are presented as a whiskers/box plot with whiskers representing the full range of values, the box representing 50 percentile and middle line representing the median. Y-axis is log<sub>10</sub> scale.

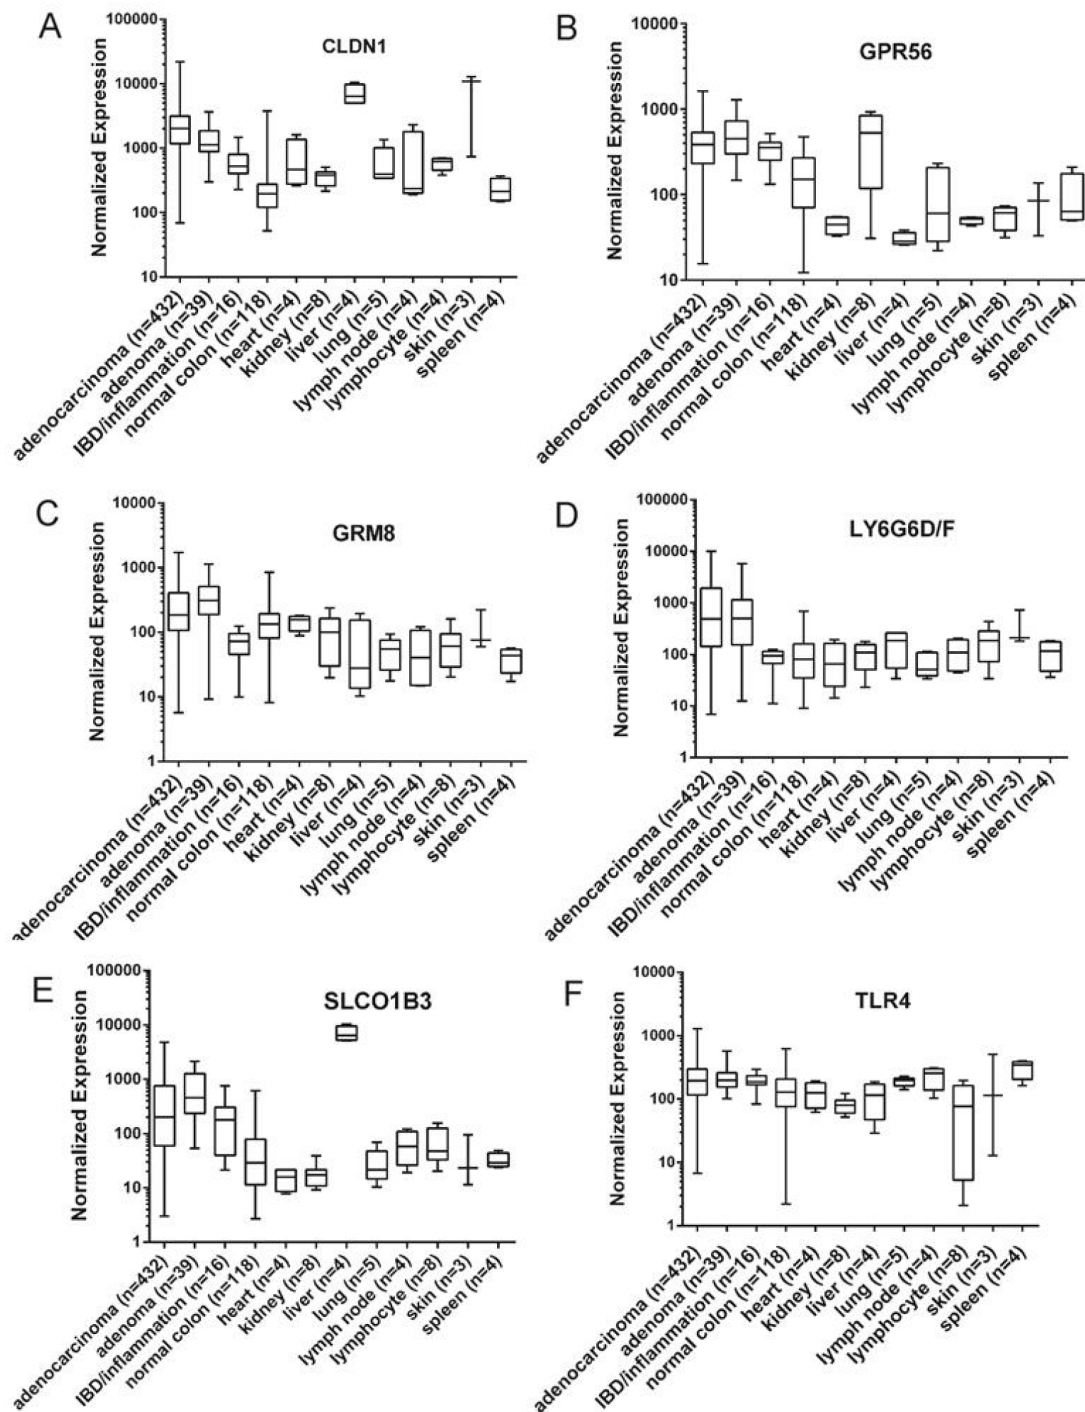

**Figure S2: Microarray mRNA expression profiles of cell-surface markers in CRC and in non-neoplastic normal gastrointestinal tissues and tissues involved in systemic toxicity and clearance.** Values are presented as a whiskers/box plot with whiskers representing the full range of values, the box representing 50 percentile and middle line representing the median. Y-axis is log10 scale.

**Table S1: Normalized mRNA expression in colorectal adenomas, adenocarcinomas and normal colon tissues (sorted by p-value)**

See Supplementary File 1

**Table S2: Proximal vs. Distal location of marker proteins (two sample t-test using the Satterthwaite method)**

| Gene/Variable | Location/Class (n) | Mean   | LowerCL<br>Mean | UpperCL<br>Mean | StdDev | P value* |
|---------------|--------------------|--------|-----------------|-----------------|--------|----------|
| CLDN1         | distal (42)        | 5.4048 | 4.6351          | 6.1744          | 2.4699 | 0.8196   |
| CLDN1         | proximal (36)      | 5.5278 | 4.7584          | 6.2972          | 2.2739 | .        |
| GPR56         | distal (37)        | 6.4865 | 5.6865          | 7.2865          | 2.3993 | 0.0342   |
| GPR56         | proximal (30)      | 7.7000 | 6.8846          | 8.5154          | 2.1838 | .        |
| GRM8          | distal (40)        | 4.2750 | 3.6395          | 4.9105          | 1.9870 | 0.2942   |
| GRM8          | proximal (34)      | 4.7647 | 4.0719          | 5.4575          | 1.9857 | .        |
| LY6G6D/F      | distal (32)        | 4.5938 | 3.6427          | 5.5448          | 2.6379 | 0.0185   |
| LY6G6D/F      | proximal (25)      | 6.1667 | 5.2376          | 7.0957          | 2.2001 | .        |
| SLCO1B3       | distal (40)        | 1.7750 | 1.4636          | 2.0864          | 0.9737 | 0.0375   |
| SLCO1B3       | proximal (34)      | 2.4706 | 1.8865          | 3.0547          | 1.6740 | .        |
| TLR4          | distal (33)        | 4.0000 | 3.1875          | 4.8125          | 2.2913 | 0.2706   |
| TLR4          | proximal (25)      | 4.7200 | 3.6709          | 5.7691          | 2.5417 | .        |
| MLH1          | Distal (46)        | 3.7609 | 2.7706          | 4.7511          | 3.3346 | 0.4992   |
| MLH1          | proximal (35)      | 3.2857 | 2.2736          | 4.2978          | 2.9463 | .        |
| PMS1          | distal (44)        | 4.8409 | 4.0964          | 5.5855          | 2.4490 | 0.5047   |
| PMS1          | proximal (34)      | 5.2059 | 4.3920          | 6.0198          | 2.3326 | .        |
| MSH2          | distal (47)        | 5.4468 | 4.6420          | 6.2516          | 2.7411 | 0.1238   |
| MSH2          | proximal (35)      | 4.6000 | 3.8492          | 5.3508          | 2.1855 | .        |
| PMS2          | distal (46)        | 5.6522 | 5.1201          | 6.1842          | 1.7916 | 0.2912   |
| PMS2          | proximal (35)      | 6.1143 | 5.4134          | 6.8152          | 2.0403 | .        |
| MSH6          | distal (38)        | 6.3947 | 5.4920          | 7.2975          | 2.7464 | 0.0592   |
| MSH6          | proximal (33)      | 7.5455 | 6.7277          | 8.3632          | 2.3061 | .        |

\*Rows with significant values are shaded grey.

Table S3: Pearson Correlation Coefficients analysis for marker and mismatch repair proteins

|             | Pearson Correlation Coefficient p value* Number of Observations |          |          |
|-------------|-----------------------------------------------------------------|----------|----------|
|             | GPR56                                                           | LY6G6D/F | SLCO1B3  |
| <b>MLH1</b> | 0.17277                                                         | 0.21819  | 0.22770  |
|             | 0.1722                                                          | 0.1202   | 0.0599   |
|             | 64                                                              | 52       | 69       |
| <b>PMS1</b> | 0.10902                                                         | 0.35373  | 0.08314  |
|             | 0.3912                                                          | 0.0101   | 0.5003   |
|             | 64                                                              | 52       | 68       |
| <b>MSH2</b> | 0.03401                                                         | -0.00463 | -0.00849 |
|             | 0.7964                                                          | 0.9740   | 0.9456   |
|             | 60                                                              | 52       | 67       |
| <b>PMS2</b> | 0.46501                                                         | 0.53076  | 0.25184  |
|             | 0.0001                                                          | <.0001   | 0.0368   |
|             | 64                                                              | 52       | 69       |
| <b>MSH6</b> | 0.54341                                                         | 0.43072  | 0.27499  |
|             | <0.0001                                                         | 0.0010   | 0.0212   |
|             | 66                                                              | 55       | 70       |

\*Significant p values are shown in red font.

**Table S4: List of cell-surface, plasma-membrane associated and secreted Affymetrix probesets**

See Supplementary File 2

**Table S5: Antibodies and dilutions for IHC, Western blot and ICC**

| <b>Antibody</b> | <b>Product</b>                             | <b>Species</b>    | <b>Dilution</b> | <b>Control Tissue</b> | <b>Size kDa</b> |
|-----------------|--------------------------------------------|-------------------|-----------------|-----------------------|-----------------|
| CLDN1           | LS Bio C104910, LifeSpan BioSciences, Inc. | Monoclonal Mouse  | 1:600           | Colon (N)             | 95              |
| TLR4            | Mab 14783, R&D Systems                     | Monoclonal Mouse  | 1:200           | Prostate Cancer       | 75              |
| LY6G6D/F        | HPA008053, Sigma Aldrich                   | Polyclonal Rabbit | 1:20            | Normal testis         | 102             |
| GPR56           | TM7XN1/GPR56, Thermo Scientific            | Polyclonal Rabbit | 1:100           | Brain GBM             | 18              |
| GRM8            | Ab53094, Abcam                             | Polyclonal Rabbit | 1:100           | Brain                 | 78              |
| SLCO1B3         | HPA004943, Sigma Aldrich                   | Polyclonal Rabbit | 1:1250          | HepatoCa              | 37              |

\*Note: LY6G6D is a truncated form of LY6G6F and the antibody used cross-reacts with both isoforms.

Table S6: Primer sets for qRT-PCR

| Target Gene    | Accession No. | Primer             | Sequence (5' to 3')                                            | Product Size (bp) |
|----------------|---------------|--------------------|----------------------------------------------------------------|-------------------|
| <i>TLR4</i>    | NT_008470.19  | forward<br>reverse | tgg cca ttg ctg cca aca tca t<br>tca aag ata cac cag cgg ctc t | 113               |
| <i>GPR56</i>   |               | forward<br>reverse | agt tct ggg cct ttg gca ttc a<br>agc aca atg caa ggc aca cag t |                   |
| <i>GRM8</i>    | AY608335      | forward<br>reverse | tgt gtt tca gct atg cag ccc t<br>act tgg gcg ctg tga cag att t | 90                |
| <i>CLDN1</i>   | NM_021101.4   | forward<br>reverse | tgg aaa ggg tgt tgg cat tgg<br>gca gcc aaa tgc ctt gct caa     | 92                |
| <i>SLC01B3</i> | NM_019844     | forward<br>reverse | ttg gct ttg cac tgg gat ctc t<br>aac caa gcc acc aag ctc caa   | 121               |
| <i>LY6G6D</i>  | NM_021246     | forward<br>reverse | atc ttg ctc agc tcc ctg ct<br>tca cgg cct ctt tgc aag aac t    | 97                |
